# Supplementary material
Source: publisher figshare collection journal article supplement (https://acs.figshare.com/ndownloader/files/26861780)
Supplement: Supplementary file 1 [file 26861780]

# First-Principles Model to Evaluate Quantitatively the Long-Life Behavior of Cellulose Acetate Polymers

Abeer Al Mohtar,<sup>\*a</sup> Sofia Nunes,<sup>b</sup> Joana Silva,<sup>b</sup> Ana Maria Ramos,<sup>b</sup> João Lopes<sup>c</sup> and Moisés L. Pinto<sup>\*a</sup>

<sup>a</sup>CERENA, Departamento de Engenharia Química, Instituto Superior Técnico, Universidade de Lisboa, 1049-001 Lisboa, Portugal. E-mail: [abeer.mohtar@tecnico.ulisboa.pt](mailto:abeer.mohtar@tecnico.ulisboa.pt) and [moises.pinto@tecnico.ulisboa.pt](mailto:moises.pinto@tecnico.ulisboa.pt)

<sup>b</sup>LAQV-REQUIMTE, Departamento de Conservação e Restauro, Faculdade de Ciências e Tecnologia, Universidade NOVA de Lisboa, 2829516 Monte De Caparica, Portugal

<sup>c</sup>iMED.Ulisboa, Faculdade de Farmácia, Universidade de Lisboa, Av. Prof. Gama Pinto, 1649-003 Lisboa, Portugal

---

This document provides supplementary information to “First-Principles Model to Evaluate Quantitatively the Long-Life Behavior of Cellulose Acetate Polymers”. In the main article, we presented the Henry’s law constants for AA on CDA films. Here we present the experimental results and the justification of the linear dependence. We present the dependence of  $K_H$  on temperature and aging of the polymer. More details on the data fitting of the dependence of water concentration on temperature, relative humidity and pH are presented as well.

---

## Table of contents

|                                                                  |    |
|------------------------------------------------------------------|----|
| 1. Acetic acid adsorption experiments.....                       | S2 |
| 2. Accelerated aging experiments.....                            | S3 |
| 3. Water concentration data fitting.....                         | S3 |
| 3.1. Water as function of relative humidity and temperature..... | S3 |
| 3.2. Moisture regain as function of pH.....                      | S4 |
| 4. Video: Transition_states_imaginary_freq.mp4.....              | S6 |

## List of Figures

Figure S1. (a) Adsorption isotherm setup, equipped with a microbalance, pressure sensor and a water bath, and (b) Acetic acid isotherms at  $T=25\text{ }^{\circ}\text{C}$  and  $T=70\text{ }^{\circ}\text{C}$ , the adsorbed number of moles of AA per gram of CDA is plotted (a) versus  $p/p^0$ .....S2

Figure S2. (a) Acetic acid isotherms at  $T=25\text{ }^{\circ}\text{C}$  and  $T=70\text{ }^{\circ}\text{C}$ , the adsorbed number of moles of AA per gram of CDA is plotted versus the concentration of AA in the chamber, and (b) Acetic acid isotherms at  $T=25\text{ }^{\circ}\text{C}$  for non-aged new CDA polymer and that of CDA aged of minus 10% DS.....S2

Figure S3. Film representative of the degradation’s heterogeneity. CDA acid catalyzed degradation experiment, week 16.....S3

Figure S4. Moisture regain as function of pH, the reported data are presented along with the best fit.....S4

Figure S5. Moisture content (equation 4) as function of pH for  $T=26\text{ }^{\circ}\text{C}$  and  $\text{RH}=35\%$ .....S4

## List of tables

|                                                                                                                                                                                                  |    |
|--------------------------------------------------------------------------------------------------------------------------------------------------------------------------------------------------|----|
| Table S.1. Tabulated data from Figure 6. “Effect of temperature on moisture equilibrium curve of 35 mm color motion picture film on cellulose triacetate base”, from Adelstein et al. paper..... | S3 |
| Table S2. Tabulated data from Lavédrine et al. paper.....                                                                                                                                        | S5 |

## 1 ACETIC ACID ADSORPTION EXPERIMENTS

Adsorption isotherms of acetic acid were measured using a microbalance system shown in Figure S1(a). About 50 mg of polymer is used for each experiment. The samples were outgassed for about 30 minutes. Small amounts of AA were injected after purification with freeze-vacuum-thaw cycles inside a vacuum cell. The injection of AA was done through controlled evaporation via the yellow valve shown in Figure S1 (a). At room temperature, with closed valve, the vapor and liquid phases of AA inside the veil are at equilibrium. The microbalance system is under high vacuum ( $10^{-6}$  mbar). When the valve is open, AA will start evaporating into the chamber, the pressure sensor reads the pressure indicating the amount of AA in the chamber, when the required amount is reached the valve is closed and the system is left to attain equilibrium. Extension rods and the pan of the microbalance were chosen to be made of silica so that we have least interaction with AA and two symmetrical pans are used in each side. Moreover, the region of pressure used (less than one tenth of saturation pressure) no condensation droplets are expected on the walls of the microbalance. The mass increase was recorded at equilibrium (via the microbalance – CI electronics) as function of the pressure (via MKS a-BARATRON capacitance manometer, 10 Torr-range) of AA at equilibrium. The temperature was kept constant with a water bath (VMR, VWB2 series, temperature stability 0.2 °C). Figure S1(b) presents the experimental measurements along with the best fits for  $T = 25$  °C and  $T = 70$  °C. Low concentrations of AA were used since it represents the practical conditions of interest. For this region, a linear relation between the concentration of AA inside the polymer and that in the atmosphere is noticed and thus can be fitted to the linear Henry’s law. Plotting the adsorbed amounts of AA per gram of CDA as function of relative pressure no temperature dependence of the Henry’s law constant is observed. This could be explained by the fact that this dependence is accounted for in the saturation pressure. While plotting this quantity as function of concentration of AA in the atmosphere (Figure S2(a)) a dependence of Henry’s law constant on temperature is observed. These two Henry’s law constants are reported in different units and care should be taken when applying these constants in other equations.

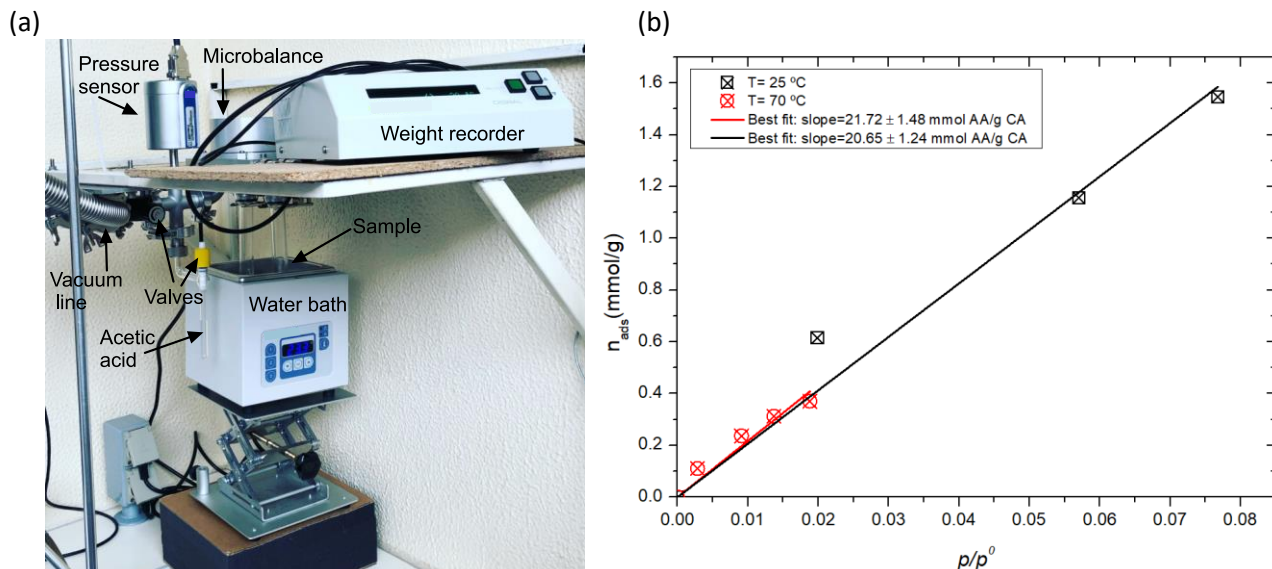

**Figure S1.** (a) Adsorption isotherm setup, equipped with a microbalance, pressure sensor and a water bath, and (b) Acetic acid isotherms at  $T = 25^\circ\text{C}$  and  $T = 70^\circ\text{C}$ , the adsorbed number of moles of AA per gram of CDA is plotted versus  $p/p^0$ . To see the effect of aging on the Henry's law constant, AA sorption isotherm measurements were performed on an aged film. The choice of the film was slightly aged film (minus 10% of DS) since this stage is the most critical one. Figure S2 (b) Shows that the experimental results of AA adsorption isotherm of new and slightly aged films. From the results and correspond fit we consider any alteration of the Henry's law constant at this stage of degradation.

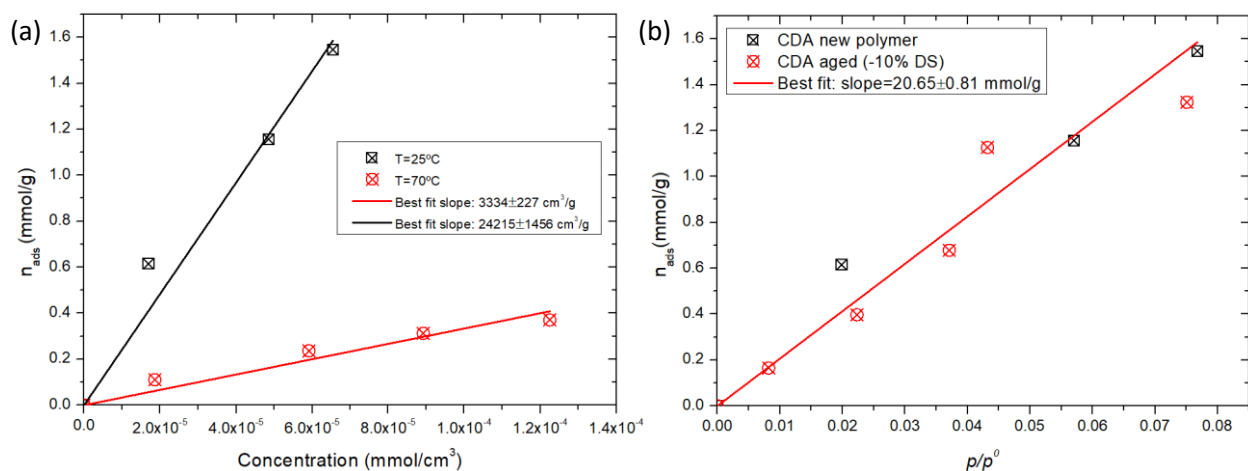

**Figure S2.** (a) Acetic acid isotherms at  $T = 25^\circ\text{C}$  and  $T = 70^\circ\text{C}$ , the adsorbed number of moles of AA per gram of CDA is plotted versus the concentration of AA in the chamber, and (b) Acetic acid isotherms at  $T = 25^\circ\text{C}$  for non-aged new CDA polymer and that of CDA aged of minus 10% DS.

## 2 ACCELERATED AGING EXPERIMENTS

Figure S3 provides a visual assessment of the non-homogenous degradation taking place at relatively advanced degradation stages (week 16) giving rise to an increased standard deviation.

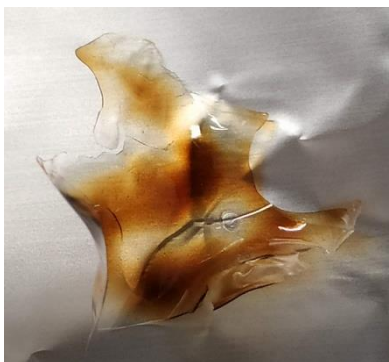

**Figure S3.** Film representative of the degradation's heterogeneity. CDA acid catalyzed degradation experiment, week 16.

### 3 WATER CONCENTRATION DATA FITTING

#### 3.1 Water as function of relative humidity and temperature:

The moisture content, as weight percentage, for cellulose triacetate color motion picture films as function of relative humidity and temperature is reported by Adelstein et al.<sup>S1</sup>. The reported data are tabulated in table S.1. The Matlab curve fitting toolbox was used to fit the data to two independent variables (cftool(x,y,z)), with  $x$ ,  $y$  vectors are the relative humidity (%) and temperature (K) respectively, and  $z=2$ -Dimensional matrix of data (Table S1).

The obtained function is:

$$\text{Moisture content (\%)} = 4.251 + 0.0488 \times \text{RH} - 0.0125 \times T \quad (\text{S1})$$

**Table S1.** Tabulated data from Figure 6. “Effect of temperature on moisture equilibrium curve of 35 mm color motion picture film on cellulose triacetate base”, from Adelstein et al. report.

|       | 60°C                 | 40°C                 | 20°C                 | 5°C                  | -16°C                |
|-------|----------------------|----------------------|----------------------|----------------------|----------------------|
| RH(%) | moisture content (%) |
| 24.39 | 1.42                 | 1.46                 | 1.66                 | 1.92                 | 2.12                 |
| 25.93 | 1.49                 | 1.55                 | 1.77                 | 1.99                 | 2.17                 |
| 27.48 | 1.58                 | 1.67                 | 1.87                 | 2.05                 | 2.22                 |
| 29.72 | 1.7                  | 1.79                 | 1.98                 | 2.12                 | 2.29                 |
| 31.96 | 1.82                 | 1.93                 | 2.06                 | 2.2                  | 2.37                 |
| 33.92 | 1.9                  | 2.03                 | 2.12                 | 2.27                 | 2.46                 |
| 36.44 | 2                    | 2.11                 | 2.22                 | 2.37                 | 2.59                 |
| 40.93 | 2.16                 | 2.26                 | 2.4                  | 2.61                 | 2.96                 |
| 44.71 | 2.28                 | 2.37                 | 2.62                 | 2.89                 | 3.34                 |
| 49.19 | 2.39                 | 2.62                 | 2.91                 | 3.33                 | 3.62                 |
| 51.99 | 2.49                 | 2.8                  | 3.1                  | 3.53                 | 3.78                 |
| 54.37 | 2.6                  | 2.95                 | 3.27                 | 3.67                 | 3.87                 |
| 56.47 | 2.72                 | 3.08                 | 3.38                 | 3.77                 | 3.95                 |
| 59.28 | 2.87                 | 3.26                 | 3.53                 | 3.88                 | 4.04                 |
| 62.22 | 3.03                 | 3.4                  | 3.67                 | 3.97                 | 4.1                  |
| 65.72 | 3.22                 | 3.57                 | 3.81                 | 4.04                 | NaN                  |
| 68.53 | 3.41                 | 3.69                 | 3.91                 | 4.08                 | NaN                  |
| 71.05 | 3.5                  | 3.78                 | 3.99                 | NaN                  | NaN                  |
| 73.15 | 3.61                 | 3.86                 | 4.04                 | NaN                  | NaN                  |
| 75.81 | 3.71                 | 3.94                 | 4.09                 | NaN                  | NaN                  |
| 78.2  | 3.84                 | 4.02                 | NaN                  | NaN                  | NaN                  |
| 79.46 | 3.9                  | 4.06                 | NaN                  | NaN                  | NaN                  |
| 81.84 | 3.98                 | NaN                  | NaN                  | NaN                  | NaN                  |
| 84.5  | 4.07                 | NaN                  | NaN                  | NaN                  | NaN                  |
| 85.9  | 4.12                 | NaN                  | NaN                  | NaN                  | NaN                  |

### 3.2 Moisture regain as function of pH:

The moisture regain data are reported in literature as percentage by weight of the original polymer<sup>S2</sup>. The data used in the current model are the ones reported for cellulose triacetate films which had been stored under archival conditions (5 °C and 15-40% RH), since they showed to be more consistent. Figure S4 presented the used data along with the best fit:

$$\text{moisture regain (\%)} = 7.2 \times 10^{11} \text{pH}^{-20.29} + 1.16. \quad (\text{S2})$$

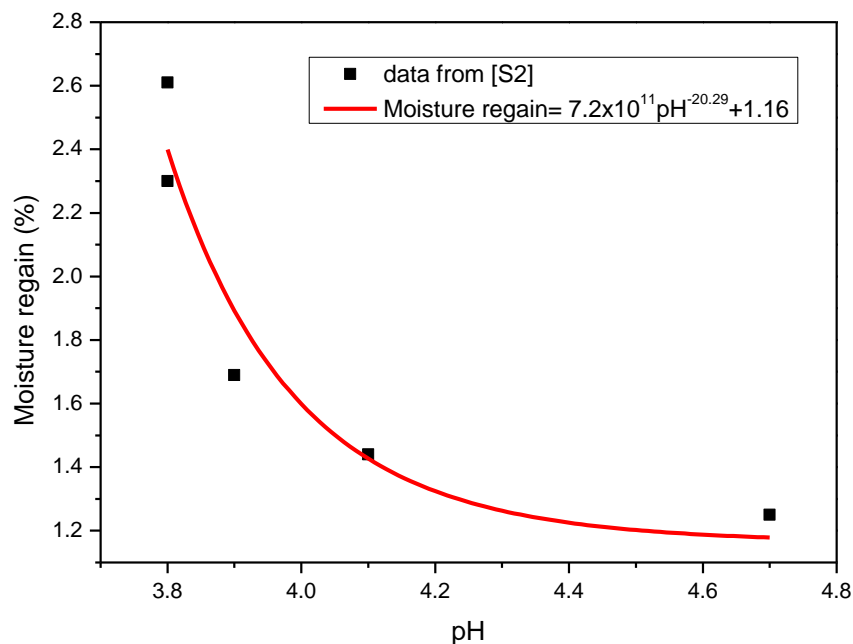

**Figure S4.** Moisture regain as function of pH, the reported data are presented along with the best fit.

However, Edge et al.<sup>S2</sup> calculate the moisture retention due to the increased acidity by putting the film in the oven for two hours at temperature (100-105 °C), this leads to the evaporation of the acquired moisture along with some original moisture content. For a new film with a pH of 6-7 no water retention is expected thus the offset of 1.16% corresponds to the original moisture content leaving the film. The moisture retention due to increased acidity is represented by the first part of the equation. Thus, adding the effect of pH on water retention to equation (S1) we get:

$$\text{Moisture content (\%)} = 4.251 + 0.0488 \times RH - 0.0125 \times T + 7.2 \times 10^{11} \text{pH}^{-20.29} + 1.16 \quad (\text{S3})$$

In a separate study performed by Lavédrine et al.<sup>S3</sup>, water content was measured for CTA-based films preconditioned at  $T=26$  °C and relative humidity 35 %, as function of degradation state of the film. They obtained the results shown in table S2. Plotting equation (S3) for the same temperature and relative humidity conditions as function of pH (6-3.5 range) Figure S5 is obtained. In the referred study they do not directly measure the pH of the films. However, the indications given in Table S2 are in line with the moisture content obtained by equation S3.

**Table S2.** Tabulated data from Lavédrine et al. paper.

| Film state                     | Water content |
|--------------------------------|---------------|
| New film                       | 2.1 %         |
| Old film, good condition       | 2.3-2.61%     |
| Vinegar syndrome “more acidic” | 4.55%         |

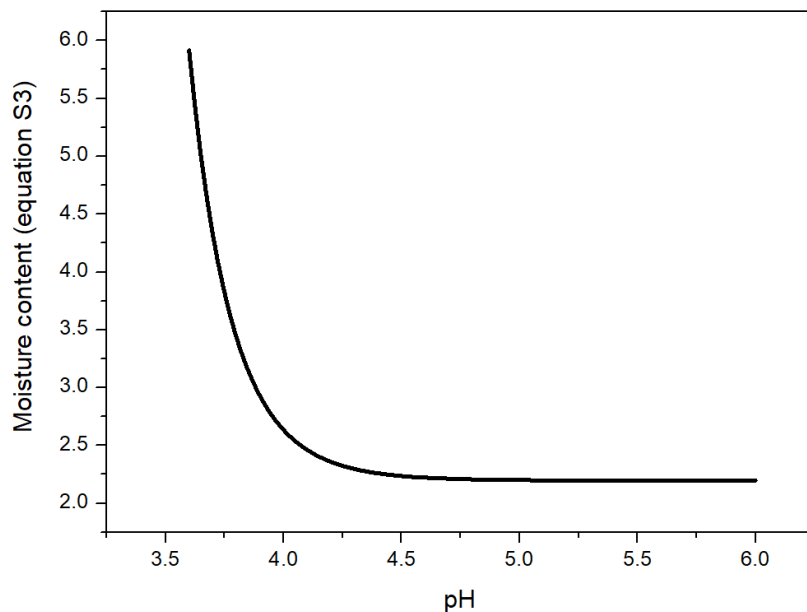

**Figure S5.** Moisture content (equation 4) as function of pH for T=26°C and RH=35%

In the developed model the unit of concentration used is mmol/g, thus equations S1 and S2 units are converted according to equation S4:

$$\begin{aligned}
 C_{\text{water}} \left( \frac{\text{mmol}_{\text{H}_2\text{O}}}{\text{g}_{\text{polymer}}} \right) &= C_{\text{water}}(\%) \left( \frac{\text{g}_{\text{H}_2\text{O}}}{100 \text{ g polymer}} \right) \times \frac{1}{M_{\text{H}_2\text{O}}} = \\
 C_{\text{water}}(\%) \left( \frac{\text{g}_{\text{H}_2\text{O}}}{100 \text{ g polymer}} \right) \times \frac{1000}{18.05} \left( \frac{\text{mmol}_{\text{H}_2\text{O}}}{\text{g}_{\text{H}_2\text{O}}} \right) &= 0.555 \times \\
 C_{\text{water}}(\%) \left( \frac{\text{mmol}_{\text{H}_2\text{O}}}{\text{g}_{\text{polymer}}} \right). &
 \end{aligned} \tag{S4}$$

Upon multiplying equation S3 by a factor of 0.55, equation 5 is obtained.

#### 4. Video: Transition\_states\_imaginary\_freq.mp4

This video shows the transition state imaginary frequency of the first and second reaction steps for the deacetylation under neutral conditions as well as that under acid-catalyzed deacetylation.

## REFERENCES

- (1) Adelstein, P. Z.; Bigourdan, J.-L.; Reilly, J. M. Moisture Relationships of Photographic Film. *J. Am. Inst. Conserv.* **1997**, *36* (3), 193. <https://doi.org/10.2307/3179948>.
- (2) Allen, N. S.; Edge, M.; Rorie, C. V.; Jewitt, T. S.; Appleyard, J. H. The Degradation and Stabilization of Historic Cellulose Acetate/Nitrate Base Motion-Picture Film. *J. Photogr. Sci.* **1988**, *36* (3), 103–106. <https://doi.org/10.1080/00223638.1988.11736978>.
- (3) Lavédrine, B., Borenstein, D., Dubail, M., Furdygiel, B., Garnier, C., Gillet, M., Langlois G., Thi-Phuong N., Rakotonirainy, M. S. *Biocontamination at the French Film Archives: Study of Its Origin and Its Remediation.*; Indiana University Press, 2017.
